# Supplementary material for: Mitochondrial Sequence Variation in African-American Primary Open-Angle Glaucoma Patients
Source: PLoS One. 2013 Oct 1;8(10):e76627. doi: 10.1371/journal.pone.0076627 (PMC3798711; doi:10.1371/journal.pone.0076627)
Supplement: Table S1 — Complete list of mtDNA variants inferred from Ion Torrent sequencing and numbers of observations. (XLS) [file pone.0076627.s001.xls]

## Sheet: Sheet1
mtDNA variants inferred from Ion Torrent sequencing and numbers of observations.
Reference (rCRS)	Variant	Position	Observed in POAG cases	Observed in Controls	mtDNA Locus	Variant Type
C	T	64	0	2	MT-HV2	Transition
A	G	73	21	19	MT-HV2	Transition
A	G	93	2	3	MT-HV2	Transition
G	A	143	2	0	MT-OHR	Transition
T	C	146	7	5	MT-OHR	Transition
C	T	150	9	11	MT-OHR	Transition
C	T	151	1	2	MT-OHR	Transition
T	C	152	14	11	MT-OHR	Transition
C	T	182	6	6	MT-OHR	Transition
G	A	185	3	1	MT-OHR	Transition
G	T	185	3	3	MT-OHR	Transversion
C	A	186	2	1	MT-OHR	Transversion
A	G	189	6	3	MT-OHR	Transition
A	C	189	2	1	MT-OHR	Transversion
T	C	195	13	11	MT-OHR	Transition
C	T	198	3	2	MT-OHR	Transition
A	G	200	3	3	MT-OHR	Transition
G	A	228	1	0	MT-CSB1	Transition
T	C	236	0	1	MT-TFX	Transition
G	A	247	5	5	MT-TFX	Transition
A	G	263	22	22	MT-TFX	Transition
A	G	297	2	0	MT-TFY	Transition
T	C	310	0	2	MT-CSB2	Transition
G	A	316	2	1	MT-CSB2	Transition
C	T	325	3	2	MT-HPR	Transition
A	C	357	1	1	MT-CSB3	Transversion
A	G	357	2	3	MT-CSB3	Transition
C	T	462	1	0	MT-HV3	Transition
T	C	489	1	1	MT-HV3	Transition
A	G	493	1	0	MT-HV3	Transition
G	A	499	1	0	MT-HV3	Transition
GCACA	G	513	0	1	MT-HV3	Deletion
GCA	G	513	7	6	MT-HV3	Deletion
A	G	517	0	1	MT-HV3	Transition
T	C	629	1	0	MT-TF	Transition
A	G	647	0	1	MT-TF	Transition
T	C	678	1	0	MT-RNR1	Transition
T	C	680	3	2	MT-RNR1	Transition
G	A	709	6	5	MT-RNR1	Transition
T	C	710	3	3	MT-RNR1	Transition
T	C	711	0	1	MT-RNR1	Transition
A	G	731	0	1	MT-RNR1	Transition
A	G	750	21	21	MT-RNR1	Transition
G	A	769	13	9	MT-RNR1	Transition
T	C	794	1	0	MT-RNR1	Transition
T	A	825	5	5	MT-RNR1	Transversion
T	C	921	0	3	MT-RNR1	Transition
T	C	961	0	1	MT-RNR1	Transition
G	A	1018	13	9	MT-RNR1	Transition
T	C	1040	0	1	MT-RNR1	Transition
C	T	1048	0	1	MT-RNR1	Transition
A	G	1438	19	18	MT-RNR1	Transition
G	A	1442	3	2	MT-RNR1	Transition
G	A	1503	0	2	MT-RNR1	Transition
A	C	1710	1	0	MT-RNR2	Transversion
T	C	1738	3	3	MT-RNR2	Transition
A	G	1811	1	0	MT-RNR2	Transition
T	C	1822	2	0	MT-RNR2	Transition
A	G	1999	0	1	MT-RNR2	Transition
C	T	2000	0	1	MT-RNR2	Transition
A	G	2245	0	1	MT-RNR2	Transition
C	T	2332	3	2	MT-RNR2	Transition
T	C	2352	7	8	MT-RNR2	Transition
CA	C	2393	2	0	MT-RNR2	Deletion
T	C	2416	8	4	MT-RNR2	Transition
T	C	2483	1	0	MT-RNR2	Transition
A	G	2706	21	20	MT-RNR2	Transition
G	A	2758	5	5	MT-RNR2	Transition
A	G	2768	3	3	MT-RNR2	Transition
C	T	2789	5	2	MT-RNR2	Transition
A	G	2833	1	0	MT-RNR2	Transition
T	C	2885	5	5	MT-RNR2	Transition
G	A	3010	4	1	MT-RNR2	Transition
C	T	3168	0	1	MT-RNR2	Transition
T	A	3200	3	2	MT-RNR2	Transversion
T	C	3308	3	3	MT-ND1	Transition
A	G	3348	0	1	MT-ND1	Transition
T	C	3396	2	0	MT-ND1	Transition
G	A	3438	1	0	MT-ND1	Transition
C	T	3450	1	1	MT-ND1	Transition
C	A	3495	1	0	MT-ND1	Transversion
A	G	3505	1	0	MT-ND1	Transition
C	A	3516	0	1	MT-ND1	Transversion
A	G	3579	0	1	MT-ND1	Transition
C	T	3588	0	1	MT-ND1	Transition
G	A	3591	0	1	MT-ND1	Transition
C	T	3594	13	9	MT-ND1	Transition
A	G	3606	0	1	MT-ND1	Transition
G	A	3666	5	4	MT-ND1	Transition
G	A	3693	3	3	MT-ND1	Transition
G	A	3745	1	0	MT-ND1	Transition
T	C	3866	0	1	MT-ND1	Transition
G	A	3915	1	0	MT-ND1	Transition
G	A	3918	2	0	MT-ND1	Transition
G	A	4048	0	2	MT-ND1	Transition
C	T	4050	1	0	MT-ND1	Transition
C	T	4059	0	1	MT-ND1	Transition
G	A	4092	0	1	MT-ND1	Transition
C	T	4094	1	0	MT-ND1	Transition
A	G	4104	13	9	MT-ND1	Transition
A	G	4203	0	2	MT-ND1	Transition
T	C	4216	1	0	MT-ND1	Transition
T	C	4218	2	0	MT-ND1	Transition
C	T	4312	0	1	MT-TI	Transition
G	A	4580	1	0	MT-ND2	Transition
T	C	4586	0	1	MT-ND2	Transition
T	C	4639	0	1	MT-ND2	Transition
G	A	4655	0	1	MT-ND2	Transition
A	G	4706	1	0	MT-ND2	Transition
A	G	4722	1	0	MT-ND2	Transition
T	C	4733	0	1	MT-ND2	Transition
A	G	4769	22	22	MT-ND2	Transition
A	G	5036	3	3	MT-ND2	Transition
G	A	5046	3	4	MT-ND2	Transition
G	C	5054	1	0	MT-ND2	Transversion
T	C	5082	1	0	MT-ND2	Transition
T	C	5096	0	1	MT-ND2	Transition
C	T	5111	0	1	MT-ND2	Transition
G	A	5147	1	3	MT-ND2	Transition
T	C	5196	1	0	MT-ND2	Transition
C	T	5210	1	0	MT-ND2	Transition
G	A	5237	1	0	MT-ND2	Transition
G	A	5252	1	0	MT-ND2	Transition
G	A	5261	0	1	MT-ND2	Transition
G	A	5262	1	1	MT-ND2	Transition
A	G	5285	2	0	MT-ND2	Transition
T	C	5393	2	3	MT-ND2	Transition
G	A	5460	1	1	MT-ND2	Transition
G	A	5471	0	2	MT-ND2	Transition
T	C	5580	1	0	MT-TW	Transition
A	G	5581	0	1	MT-TW	Transition
A	G	5584	1	0	MT-TW	Transition
C	T	5601	2	0	MT-TA	Transition
C	T	5603	0	1	MT-TA	Transition
T	C	5655	3	3	MT-TA	Transition
G	A	5773	1	1	MT-TC	Transition
A	G	5951	2	1	MT-CO1	Transition
C	A	5987	1	0	MT-CO1	Transversion
T	C	6071	2	1	MT-CO1	Transition
G	A	6150	2	1	MT-CO1	Transition
T	C	6152	1	0	MT-CO1	Transition
C	T	6164	0	1	MT-CO1	Transition
G	A	6179	1	0	MT-CO1	Transition
T	C	6185	0	1	MT-CO1	Transition
T	A	6221	0	1	MT-CO1	Transversion
T	C	6221	3	2	MT-CO1	Transition
T	C	6253	1	0	MT-CO1	Transition
G	A	6260	1	1	MT-CO1	Transition
G	A	6480	1	0	MT-CO1	Transition
C	T	6500	1	0	MT-CO1	Transition
T	C	6524	0	1	MT-CO1	Transition
C	T	6548	3	3	MT-CO1	Transition
C	T	6587	2	1	MT-CO1	Transition
A	G	6629	1	0	MT-CO1	Transition
A	G	6663	2	0	MT-CO1	Transition
T	C	6680	0	3	MT-CO1	Transition
T	C	6827	3	3	MT-CO1	Transition
G	A	6917	0	1	MT-CO1	Transition
A	G	6989	3	3	MT-CO1	Transition
T	C	7022	0	1	MT-CO1	Transition
C	T	7028	21	20	MT-CO1	Transition
A	G	7055	5	3	MT-CO1	Transition
A	G	7076	1	0	MT-CO1	Transition
A	G	7146	5	5	MT-CO1	Transition
T	C	7175	5	2	MT-CO1	Transition
C	T	7256	13	9	MT-CO1	Transition
C	T	7274	5	2	MT-CO1	Transition
G	A	7337	1	0	MT-CO1	Transition
T	C	7389	5	4	MT-CO1	Transition
A	G	7394	0	1	MT-CO1	Transition
A	G	7424	0	3	MT-CO1	Transition
C	T	7471	1	0	MT-TS1	Transition
G	A	7498	0	1	MT-TS1	Transition
G	A	7521	13	9	MT-TD	Transition
T	A	7624	3	2	MT-CO2	Transversion
G	A	7642	0	1	MT-CO2	Transition
C	T	7648	0	2	MT-CO2	Transition
A	G	7673	1	0	MT-CO2	Transition
A	G	7765	0	1	MT-CO2	Transition
A	G	7771	5	2	MT-CO2	Transition
G	A	7789	0	1	MT-CO2	Transition
G	A	7805	0	1	MT-CO2	Transition
C	A	7819	2	0	MT-CO2	Transversion
C	T	7867	3	3	MT-CO2	Transition
A	G	7960	1	1	MT-CO2	Transition
G	A	8020	1	0	MT-CO2	Transition
G	A	8027	2	1	MT-CO2	Transition
G	A	8206	8	4	MT-CO2	Transition
T	C	8222	1	0	MT-CO2	Transition
A	G	8248	3	3	MT-CO2	Transition
C	T	8274	1	0	MT-CO2	Transition
C	T	8410	1	0	MT-ATP8	Transition
C	T	8428	0	1	MT-ATP8	Transition
C	T	8429	1	0	MT-ATP8	Transition
C	T	8468	5	5	MT-ATP8	Transition
A	G	8470	1	0	MT-ATP8	Transition
A	G	8527	2	0	MT-ATP6	Transition
G	A	8541	1	0	MT-ATP6	Transition
T	C	8551	0	1	MT-ATP6	Transition
A	G	8566	0	1	MT-ATP6	Transition
T	C	8567	1	0	MT-ATP6	Transition
T	C	8618	0	1	MT-ATP6	Transition
C	T	8650	1	0	MT-ATP6	Transition
C	T	8655	5	5	MT-ATP6	Transition
A	G	8701	20	19	MT-ATP6	Transition
C	T	8768	0	1	MT-ATP6	Transition
T	C	8772	1	0	MT-ATP6	Transition
A	G	8784	1	0	MT-ATP6	Transition
G	A	8790	1	0	MT-ATP6	Transition
A	G	8817	1	0	MT-ATP6	Transition
G	A	8854	0	1	MT-ATP6	Transition
A	G	8860	22	22	MT-ATP6	Transition
T	C	8877	1	0	MT-ATP6	Transition
C	T	8932	2	0	MT-ATP6	Transition
G	A	8995	0	1	MT-ATP6	Transition
C	T	9042	0	1	MT-ATP6	Transition
A	G	9072	2	1	MT-ATP6	Transition
T	C	9078	0	1	MT-ATP6	Transition
G	A	9196	0	1	MT-ATP6	Transition
A	G	9221	8	4	MT-CO3	Transition
T	C	9233	0	1	MT-CO3	Transition
G	A	9266	1	0	MT-CO3	Transition
A	G	9347	0	1	MT-CO3	Transition
A	G	9377	1	0	MT-CO3	Transition
C	T	9449	1	1	MT-CO3	Transition
A	G	9494	1	0	MT-CO3	Transition
T	C	9540	20	19	MT-CO3	Transition
A	G	9545	1	1	MT-CO3	Transition
G	A	9554	0	1	MT-CO3	Transition
C	T	9605	1	0	MT-CO3	Transition
C	T	9752	1	0	MT-CO3	Transition
G	C	9753	0	1	MT-CO3	Transversion
G	A	9755	0	1	MT-CO3	Transition
C	T	9818	0	1	MT-CO3	Transition
T	C	9950	2	0	MT-CO3	Transition
G	A	9966	0	1	MT-CO3	Transition
T	C	10007	1	0	MT-TG	Transition
C	T	10070	1	0	MT-ND3	Transition
A	G	10086	1	1	MT-ND3	Transition
G	T	10098	0	1	MT-ND3	Transversion
T	C	10115	8	4	MT-ND3	Transition
C	T	10257	0	1	MT-ND3	Transition
T	C	10321	2	0	MT-ND3	Transition
T	C	10370	1	1	MT-ND3	Transition
G	A	10373	1	1	MT-ND3	Transition
A	G	10398	21	19	MT-ND3	Transition
C	T	10400	0	1	MT-ND3	Transition
G	A	10586	2	1	MT-ND4L	Transition
G	A	10589	0	1	MT-ND4L	Transition
T	C	10640	0	2	MT-ND4L	Transition
C	T	10664	0	1	MT-ND4L	Transition
T	C	10667	0	1	MT-ND4L	Transition
G	A	10688	5	5	MT-ND4L	Transition
A	T	10694	0	1	MT-ND4L	Transversion
A	G	10700	1	0	MT-ND4L	Transition
A	G	10792	1	0	MT-ND4	Transition
C	T	10793	1	0	MT-ND4	Transition
T	C	10810	5	5	MT-ND4	Transition
A	G	10816	0	1	MT-ND4	Transition
A	G	10819	4	5	MT-ND4	Transition
T	C	10873	15	17	MT-ND4	Transition
T	C	10909	0	1	MT-ND4	Transition
T	C	10915	0	1	MT-ND4	Transition
C	T	10920	0	1	MT-ND4	Transition
T	C	10927	1	0	MT-ND4	Transition
A	G	10978	1	1	MT-ND4	Transition
A	G	11002	2	1	MT-ND4	Transition
A	G	11020	1	0	MT-ND4	Transition
A	G	11101	1	0	MT-ND4	Transition
T	C	11152	0	1	MT-ND4	Transition
A	G	11164	1	0	MT-ND4	Transition
G	A	11176	0	1	MT-ND4	Transition
A	G	11251	1	0	MT-ND4	Transition
C	T	11257	1	0	MT-ND4	Transition
A	G	11290	1	0	MT-ND4	Transition
C	T	11302	0	1	MT-ND4	Transition
G	A	11440	2	0	MT-ND4	Transition
A	G	11467	0	1	MT-ND4	Transition
A	G	11641	0	1	MT-ND4	Transition
A	G	11654	1	0	MT-ND4	Transition
G	A	11719	21	20	MT-ND4	Transition
T	C	11722	1	0	MT-ND4	Transition
C	T	11813	1	0	MT-ND4	Transition
C	T	11815	0	1	MT-ND4	Transition
G	A	11887	0	2	MT-ND4	Transition
G	A	11914	5	3	MT-ND4	Transition
A	G	11928	1	0	MT-ND4	Transition
T	C	11944	8	4	MT-ND4	Transition
G	A	12007	0	1	MT-ND4	Transition
C	T	12019	0	1	MT-ND4	Transition
T	C	12028	0	1	MT-ND4	Transition
C	T	12049	2	0	MT-ND4	Transition
A	G	12172	1	0	MT-TH	Transition
G	A	12236	3	2	MT-TS2	Transition
A	G	12248	0	1	MT-TS2	Transition
A	G	12266	1	0	MT-TL2	Transition
A	G	12308	0	1	MT-TL2	Transition
T	C	12354	1	0	MT-ND5	Transition
A	G	12358	0	2	MT-ND5	Transition
G	A	12372	0	1	MT-ND5	Transition
G	A	12501	0	1	MT-ND5	Transition
T	C	12519	3	3	MT-ND5	Transition
C	T	12557	1	0	MT-ND5	Transition
T	C	12609	1	0	MT-ND5	Transition
A	G	12612	1	0	MT-ND5	Transition
G	A	12618	0	1	MT-ND5	Transition
G	A	12630	1	0	MT-ND5	Transition
T	C	12678	1	0	MT-ND5	Transition
A	G	12693	5	2	MT-ND5	Transition
T	C	12696	1	0	MT-ND5	Transition
C	T	12705	20	19	MT-ND5	Transition
A	G	12720	0	1	MT-ND5	Transition
G	A	12771	1	0	MT-ND5	Transition
A	G	12781	0	1	MT-ND5	Transition
A	G	12810	2	1	MT-ND5	Transition
C	T	13002	0	1	MT-ND5	Transition
A	C	13101	0	1	MT-ND5	Transversion
A	G	13105	6	9	MT-ND5	Transition
G	A	13135	1	0	MT-ND5	Transition
A	G	13149	2	0	MT-ND5	Transition
T	C	13182	0	1	MT-ND5	Transition
C	T	13197	0	1	MT-ND5	Transition
A	G	13269	1	0	MT-ND5	Transition
A	G	13276	0	1	MT-ND5	Transition
A	G	13308	0	1	MT-ND5	Transition
C	T	13329	1	0	MT-ND5	Transition
A	G	13470	1	0	MT-ND5	Transition
A	G	13485	2	1	MT-ND5	Transition
T	C	13500	0	1	MT-ND5	Transition
C	T	13506	5	5	MT-ND5	Transition
T	C	13581	1	0	MT-ND5	Transition
G	A	13590	8	6	MT-ND5	Transition
C	T	13650	13	9	MT-ND5	Transition
A	G	13651	0	1	MT-ND5	Transition
T	C	13665	0	1	MT-ND5	Transition
G	A	13708	1	2	MT-ND5	Transition
A	G	13741	1	0	MT-ND5	Transition
C	T	13749	1	0	MT-ND5	Transition
T	C	13789	5	4	MT-ND5	Transition
A	G	13803	5	2	MT-ND5	Transition
T	C	13879	1	0	MT-ND5	Transition
C	A	13880	3	3	MT-ND5	Transversion
T	C	13886	0	3	MT-ND5	Transition
C	A	13914	1	1	MT-ND5	Transversion
G	C	13928	3	2	MT-ND5	Transversion
C	T	13934	1	0	MT-ND5	Transition
G	C	13958	3	2	MT-ND5	Transversion
G	A	13980	0	1	MT-ND5	Transition
T	A	14000	2	1	MT-ND5	Transversion
G	A	14016	1	0	MT-ND5	Transition
C	T	14130	0	1	MT-ND5	Transition
A	G	14152	2	1	MT-ND6	Transition
G	A	14162	0	1	MT-ND6	Transition
T	C	14178	5	4	MT-ND6	Transition
A	G	14179	0	1	MT-ND6	Transition
A	G	14203	3	3	MT-ND6	Transition
T	C	14212	4	5	MT-ND6	Transition
A	G	14260	0	1	MT-ND6	Transition
C	T	14284	0	2	MT-ND6	Transition
T	C	14319	0	1	MT-ND6	Transition
A	G	14527	0	1	MT-ND6	Transition
G	A	14560	3	4	MT-ND6	Transition
A	G	14566	4	2	MT-ND6	Transition
A	G	14599	1	0	MT-ND6	Transition
T	C	14634	0	1	MT-ND6	Transition
C	T	14766	20	20	MT-CYB	Transition
A	G	14769	4	3	MT-CYB	Transition
C	G	14770*	1	2	MT-CYB	Transversion	* Note: likely false positive: present only in samples with m.14769A>G; these two variants together would create a stop codon
T	C	14783	0	1	MT-CYB	Transition
T	C	14798	1	0	MT-CYB	Transition
T	C	14857	1	0	MT-CYB	Transition
G	A	14861	1	0	MT-CYB	Transition
G	A	14905	1	3	MT-CYB	Transition
C	T	14911	2	1	MT-CYB	Transition
G	A	15043	0	2	MT-CYB	Transition
G	A	15110	3	3	MT-CYB	Transition
T	C	15115	3	3	MT-CYB	Transition
C	T	15136	0	1	MT-CYB	Transition
G	A	15172	0	2	MT-CYB	Transition
G	A	15217	3	2	MT-CYB	Transition
A	G	15226	0	1	MT-CYB	Transition
T	C	15229	0	1	MT-CYB	Transition
A	G	15244	2	0	MT-CYB	Transition
G	A	15301	15	14	MT-CYB	Transition
T	C	15310	1	0	MT-CYB	Transition
A	G	15311	1	1	MT-CYB	Transition
G	A	15314	0	1	MT-CYB	Transition
G	A	15317	0	1	MT-CYB	Transition
A	G	15326	22	22	MT-CYB	Transition
G	A	15355	0	1	MT-CYB	Transition
C	T	15391	1	0	MT-CYB	Transition
G	A	15431	0	1	MT-CYB	Transition
C	A	15452	1	0	MT-CYB	Transversion
G	A	15497	0	1	MT-CYB	Transition
T	C	15514	1	0	MT-CYB	Transition
C	T	15625	0	1	MT-CYB	Transition
T	C	15629	2	0	MT-CYB	Transition
C	T	15637	0	1	MT-CYB	Transition
T	C	15670	2	1	MT-CYB	Transition
G	A	15734	1	0	MT-CYB	Transition
A	G	15758	0	1	MT-CYB	Transition
G	A	15777	1	0	MT-CYB	Transition
T	C	15784	5	2	MT-CYB	Transition
C	T	15790	1	1	MT-CYB	Transition
G	A	15812	0	1	MT-CYB	Transition
A	G	15824	1	1	MT-CYB	Transition
C	T	15849	3	2	MT-CYB	Transition
C	T	15886	1	0	MT-CYB	Transition
G	A	15894	1	0	MT-TT	Transition
T	C	15905	0	1	MT-TT	Transition
G	A	15927	0	1	MT-TT	Transition
T	C	15942	2	1	MT-TT	Transition
C	T	15978	0	2	MT-TP	Transition
A	G	16051	1	0	MT-DLOOP	Transition
C	T	16069	1	0	MT-DLOOP	Transition
T	C	16075	1	0	MT-DLOOP	Transition
A	G	16078	1	0	MT-DLOOP	Transition
T	C	16086	0	1	MT-DLOOP	Transition
T	C	16093	1	1	MT-DLOOP	Transition
T	C	16124	1	4	MT-DLOOP	Transition
T	C	16126	4	3	MT-DLOOP	Transition
G	A	16129	4	2	MT-DLOOP	Transition
G	A	16145	0	1	MT-DLOOP	Transition
C	T	16148	0	2	MT-DLOOP	Transition
C	T	16150	1	0	MT-DLOOP	Transition
A	G	16162	1	0	MT-DLOOP	Transition
C	T	16168	0	1	MT-DLOOP	Transition
T	C	16172	1	7	MT-DLOOP	Transition
C	T	16174	1	0	MT-DLOOP	Transition
A	G	16177	1	0	MT-DLOOP	Transition
A	G	16183	1	0	MT-DLOOP	Transition
C	T	16185	1	0	MT-DLOOP	Transition
C	T	16187	5	4	MT-DLOOP	Transition
C	G	16188	0	1	MT-DLOOP	Transversion
T	C	16189	5	10	MT-DLOOP	Transition
C	T	16192	1	1	MT-DLOOP	Transition
T	C	16209	2	0	MT-DLOOP	Transition
A	G	16215	0	1	MT-DLOOP	Transition
C	T	16218	1	0	MT-DLOOP	Transition
A	G	16219	0	1	MT-DLOOP	Transition
C	T	16221	1	0	MT-DLOOP	Transition
C	T	16222	0	1	MT-DLOOP	Transition
C	T	16223	19	19	MT-DLOOP	Transition
A	G	16230	0	1	MT-DLOOP	Transition
A	G	16253	1	0	MT-DLOOP	Transition
C	T	16259	0	1	MT-DLOOP	Transition
C	T	16261	1	0	MT-DLOOP	Transition
T	C	16263	0	1	MT-DLOOP	Transition
C	T	16264	5	4	MT-DLOOP	Transition
A	T	16265	0	1	MT-DLOOP	Transversion
A	C	16265	1	0	MT-DLOOP	Transversion
C	T	16270	3	3	MT-DLOOP	Transition
C	T	16278	13	12	MT-DLOOP	Transition
A	G	16284	0	1	MT-DLOOP	Transition
C	T	16286	1	0	MT-DLOOP	Transition
C	A	16286	1	0	MT-DLOOP	Transversion
C	T	16292	2	0	MT-DLOOP	Transition
A	G	16293	4	1	MT-DLOOP	Transition
C	T	16294	7	3	MT-DLOOP	Transition
C	T	16295	0	1	MT-DLOOP	Transition
C	T	16301	1	0	MT-DLOOP	Transition
A	G	16309	3	1	MT-DLOOP	Transition
T	C	16311	8	6	MT-DLOOP	Transition
A	G	16318	1	0	MT-DLOOP	Transition
G	A	16319	0	3	MT-DLOOP	Transition
C	T	16320	2	4	MT-DLOOP	Transition
C	T	16327	2	1	MT-DLOOP	Transition
C	T	16355	1	0	MT-DLOOP	Transition
T	C	16356	1	0	MT-DLOOP	Transition
C	T	16360	2	1	MT-DLOOP	Transition
T	C	16362	1	2	MT-DLOOP	Transition
T	C	16368	4	0	MT-DLOOP	Transition
G	A	16390	9	4	MT-DLOOP	Transition
A	G	16399	1	1	MT-DLOOP	Transition

## Sheet: Sheet2
Position	Reference	Variant
64	C	T
73	A	G
93	A	G
143	G	A
146	T	C
150	C	T
151	C	T
152	T	C
182	C	T
185	G	A
185	G	T
186	C	A
189	A	G
189	A	C
195	T	C
198	C	T
200	A	G
228	G	A
236	T	C
247	G	A
263	A	G
297	A	G
310	T	C
316	G	A
325	C	T
357	A	G
357	A	C
462	C	T
489	T	C
493	A	G
499	G	A
513	GCACA	G
513	GCA	G
517	A	G
629	T	C
647	A	G
678	T	C
680	T	C
709	G	A
710	T	C
711	T	C
731	A	G
750	A	G
769	G	A
794	T	C
825	T	A
921	T	C
961	T	C
1018	G	A
1040	T	C
1048	C	T
1438	A	G
1442	G	A
1503	G	A
1710	A	C
1738	T	C
1811	A	G
1822	T	C
1999	A	G
2000	C	T
2245	A	G
2332	C	T
2352	T	C
2393	CA	C
2416	T	C
2483	T	C
2706	A	G
2758	G	A
2768	A	G
2789	C	T
2833	A	G
2885	T	C
3010	G	A
3168	C	T
3200	T	A
3308	T	C
3348	A	G
3396	T	C
3438	G	A
3450	C	T
3495	C	A
3505	A	G
3516	C	A
3579	A	G
3588	C	T
3591	G	A
3594	C	T
3606	A	G
3666	G	A
3693	G	A
3745	G	A
3866	T	C
3915	G	A
3918	G	A
4048	G	A
4050	C	T
4059	C	T
4092	G	A
4094	C	T
4104	A	G
4203	A	G
4216	T	C
4218	T	C
4312	C	T
4580	G	A
4586	T	C
4639	T	C
4655	G	A
4706	A	G
4722	A	G
4733	T	C
4769	A	G
5036	A	G
5046	G	A
5054	G	C
5082	T	C
5096	T	C
5111	C	T
5147	G	A
5196	T	C
5210	C	T
5237	G	A
5252	G	A
5261	G	A
5262	G	A
5285	A	G
5393	T	C
5460	G	A
5471	G	A
5580	T	C
5581	A	G
5584	A	G
5601	C	T
5603	C	T
5655	T	C
5773	G	A
5951	A	G
5987	C	A
6071	T	C
6150	G	A
6152	T	C
6164	C	T
6179	G	A
6185	T	C
6221	T	A
6221	T	C
6253	T	C
6260	G	A
6480	G	A
6500	C	T
6524	T	C
6548	C	T
6587	C	T
6629	A	G
6663	A	G
6680	T	C
6827	T	C
6917	G	A
6989	A	G
7022	T	C
7028	C	T
7055	A	G
7076	A	G
7146	A	G
7175	T	C
7256	C	T
7274	C	T
7337	G	A
7389	T	C
7394	A	G
7424	A	G
7471	C	T
7498	G	A
7521	G	A
7624	T	A
7642	G	A
7648	C	T
7673	A	G
7765	A	G
7771	A	G
7789	G	A
7805	G	A
7819	C	A
7867	C	T
7960	A	G
8020	G	A
8027	G	A
8206	G	A
8222	T	C
8248	A	G
8274	C	T
8410	C	T
8428	C	T
8429	C	T
8468	C	T
8470	A	G
8527	A	G
8541	G	A
8551	T	C
8566	A	G
8567	T	C
8618	T	C
8650	C	T
8655	C	T
8701	A	G
8768	C	T
8772	T	C
8784	A	G
8790	G	A
8817	A	G
8854	G	A
8860	A	G
8877	T	C
8932	C	T
8995	G	A
9042	C	T
9072	A	G
9078	T	C
9196	G	A
9221	A	G
9233	T	C
9266	G	A
9347	A	G
9377	A	G
9449	C	T
9494	A	G
9540	T	C
9545	A	G
9554	G	A
9605	C	T
9752	C	T
9753	G	C
9755	G	A
9818	C	T
9950	T	C
9966	G	A
10007	T	C
10070	C	T
10086	A	G
10098	G	T
10115	T	C
10257	C	T
10321	T	C
10370	T	C
10373	G	A
10398	A	G
10400	C	T
10586	G	A
10589	G	A
10640	T	C
10664	C	T
10667	T	C
10688	G	A
10694	A	T
10700	A	G
10792	A	G
10793	C	T
10810	T	C
10816	A	G
10819	A	G
10873	T	C
10909	T	C
10915	T	C
10920	C	T
10927	T	C
10978	A	G
11002	A	G
11020	A	G
11101	A	G
11152	T	C
11164	A	G
11176	G	A
11251	A	G
11257	C	T
11290	A	G
11302	C	T
11440	G	A
11467	A	G
11641	A	G
11654	A	G
11719	G	A
11722	T	C
11813	C	T
11815	C	T
11887	G	A
11914	G	A
11928	A	G
11944	T	C
12007	G	A
12019	C	T
12028	T	C
12049	C	T
12172	A	G
12236	G	A
12248	A	G
12266	A	G
12308	A	G
12354	T	C
12358	A	G
12372	G	A
12501	G	A
12519	T	C
12557	C	T
12609	T	C
12612	A	G
12618	G	A
12630	G	A
12678	T	C
12693	A	G
12696	T	C
12705	C	T
12720	A	G
12771	G	A
12781	A	G
12810	A	G
13002	C	T
13101	A	C
13105	A	G
13135	G	A
13149	A	G
13182	T	C
13197	C	T
13269	A	G
13276	A	G
13308	A	G
13329	C	T
13470	A	G
13485	A	G
13500	T	C
13506	C	T
13581	T	C
13590	G	A
13650	C	T
13651	A	G
13665	T	C
13708	G	A
13741	A	G
13749	C	T
13789	T	C
13803	A	G
13879	T	C
13880	C	A
13886	T	C
13914	C	A
13928	G	C
13934	C	T
13958	G	C
13980	G	A
14000	T	A
14016	G	A
14130	C	T
14152	A	G
14162	G	A
14178	T	C
14179	A	G
14203	A	G
14212	T	C
14260	A	G
14284	C	T
14319	T	C
14527	A	G
14560	G	A
14566	A	G
14599	A	G
14634	T	C
14766	C	T
14769	A	G
14770	C	G
14783	T	C
14798	T	C
14857	T	C
14861	G	A
14905	G	A
14911	C	T
15043	G	A
15110	G	A
15115	T	C
15136	C	T
15172	G	A
15217	G	A
15226	A	G
15229	T	C
15244	A	G
15301	G	A
15310	T	C
15311	A	G
15314	G	A
15317	G	A
15326	A	G
15355	G	A
15391	C	T
15431	G	A
15452	C	A
15497	G	A
15514	T	C
15625	C	T
15629	T	C
15637	C	T
15670	T	C
15734	G	A
15758	A	G
15777	G	A
15784	T	C
15790	C	T
15812	G	A
15824	A	G
15849	C	T
15886	C	T
15894	G	A
15905	T	C
15927	G	A
15942	T	C
15978	C	T
16051	A	G
16069	C	T
16075	T	C
16078	A	G
16086	T	C
16093	T	C
16124	T	C
16126	T	C
16129	G	A
16145	G	A
16148	C	T
16150	C	T
16162	A	G
16168	C	T
16172	T	C
16174	C	T
16177	A	G
16183	A	G
16185	C	T
16187	C	T
16188	C	G
16189	T	C
16192	C	T
16209	T	C
16215	A	G
16218	C	T
16219	A	G
16221	C	T
16222	C	T
16223	C	T
16230	A	G
16253	A	G
16259	C	T
16261	C	T
16263	T	C
16264	C	T
16265	A	C
16265	A	T
16270	C	T
16278	C	T
16284	A	G
16286	C	T
16286	C	A
16292	C	T
16293	A	G
16294	C	T
16295	C	T
16301	C	T
16309	A	G
16311	T	C
16318	A	G
16319	G	A
16320	C	T
16327	C	T
16355	C	T
16356	T	C
16360	C	T
16362	T	C
16368	T	C
16390	G	A
16399	A	G
